# Supplementary material for: The role of aromatic L-amino acid decarboxylase in bacillamide C biosynthesis by Bacillus atrophaeus C89
Source: PubMed Central journal article supplement — Sci Rep. 2013 Apr 30;3:1753. doi: 10.1038/srep01753 (PMC3639450; doi:10.1038/srep01753), 2013-04-30

**Title page:**

**The role of aromatic L-amino acid decarboxylase in bacillamide C biosynthesis**

**by *Bacillus atrophaeus* C89**

Lei Yuwen<sup>#</sup>, Feng-Li Zhang<sup>#</sup>, Qi-Hua Chen, Shuang-Jun Lin, Yi-Lei Zhao, Zhi-Yong Li<sup>\*</sup>

## Supplemental information

**Fig. S1** Structure of bacillamides (left to right: bacillamide A, bacillamide B, bacillamide C, bacillamide D)

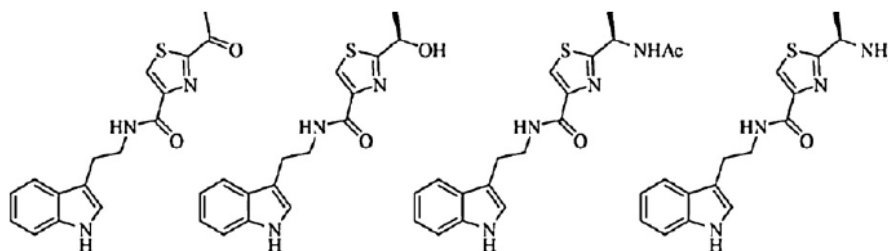

Supplement: srep01753-s1.pdf [file srep01753-s1.pdf]
